# Supplementary material for: Unveiling the unique mechanism of UV-sensitive phosphonate-based metal–organic frameworks
Source: Royal Society of Chemistry journal article supplement (doi:10.1039/d4qi00757c), 2024-01-01
Supplement: d4qi00757c1.pdf [file d4qi00757c1.pdf]

## Supporting Information

### Unveiling the unique mechanism of the UV-sensitive phosphonate-based metal-organic frameworks

Wenzhuo Tan,<sup>ab</sup> Li Xu,<sup>ab</sup> Ziwei Liu,<sup>ab</sup> Jihu Su,<sup>c</sup> and Tao Zheng <sup>\*ab</sup>

---

<sup>a</sup> School of Materials Science and Engineering, Northwestern Polytechnical University, Xi'an 710072, P. R. China. E-mail: zhengtao@nwpu.edu.cn

<sup>b</sup> Institute of Clean Energy, Yangtze River Delta Research Institute, Northwestern Polytechnical University, Suzhou 215400, P. R. China.

<sup>c</sup> Hefei National Laboratory for Physical Sciences at Microscale and Department of Modern Physics, University of Science and Technology of China, Hefei 230026, P. R. China

# Contents

|                                                                      |    |
|----------------------------------------------------------------------|----|
| 1. Results and Discussion.....                                       | 3  |
| 1.1 The Phosphonate Ligand and the Guest Molecules.....              | 3  |
| 1.2 Crystal Data and Structures.....                                 | 4  |
| 1.3 Analysis of Weak Interaction.....                                | 11 |
| 1.4 Powder X-ray Diffraction .....                                   | 15 |
| 1.5 IR and Raman Spectra .....                                       | 17 |
| 1.6 Thermal Gravimetric Analysis.....                                | 18 |
| 1.7 UV-vis Absorption Spectra.....                                   | 19 |
| 1.8 Photoluminescence Spectra and Fluorescence Quenching Curves..... | 20 |
| 1.9 Determination of detection limit .....                           | 30 |
| 1.10 EPR Spectra Before and After UV Irradiation .....               | 31 |
| 2. References.....                                                   | 32 |

# 1. Results and Discussion

## 1.1 The Phosphonate Ligand and the Guest Molecules

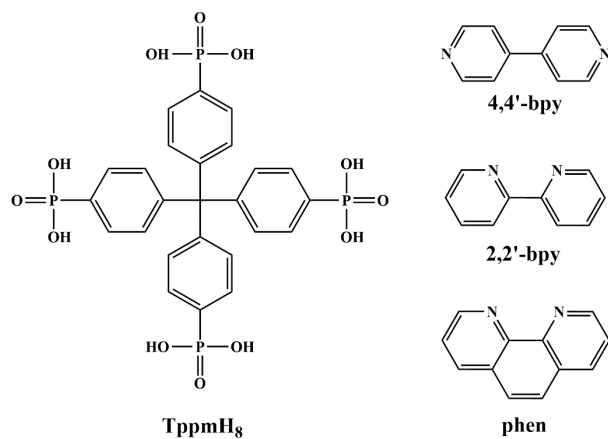

**Figure S1.** The TppmH<sub>8</sub> ligand and guest molecules.

## 1.2 Crystal Data and Structures

**Table S1.** Crystal data and refinement details for **UPF-112**, **UPF-113** and **UPF-114**.

|                                                                                                                | UPF-112                                                                         | UPF-113                                                                                      | UPF-114                                                                                      |
|----------------------------------------------------------------------------------------------------------------|---------------------------------------------------------------------------------|----------------------------------------------------------------------------------------------|----------------------------------------------------------------------------------------------|
| Formula                                                                                                        | C <sub>40</sub> H <sub>40</sub> O <sub>17</sub> P <sub>4</sub> N <sub>3</sub> U | C <sub>35</sub> H <sub>32</sub> O <sub>18</sub> P <sub>4</sub> U <sub>2</sub> N <sub>2</sub> | C <sub>74</sub> H <sub>58</sub> O <sub>30</sub> P <sub>8</sub> U <sub>3</sub> N <sub>4</sub> |
| M                                                                                                              | 1196.68                                                                         | 1368.58                                                                                      | 2445.14                                                                                      |
| CCDC No.                                                                                                       | 2295557                                                                         | 2295555                                                                                      | 2295556                                                                                      |
| Crystal system                                                                                                 | Monoclinic                                                                      | Triclinic                                                                                    | Monoclinic                                                                                   |
| Space group                                                                                                    | <i>P</i> 2 <sub>1</sub> / <i>n</i>                                              | <i>P</i> $\bar{1}$                                                                           | <i>C</i> 2/ <i>c</i>                                                                         |
| <i>a</i> / Å                                                                                                   | 13.0819(13)                                                                     | 10.7280(12)                                                                                  | 21.053(6)                                                                                    |
| <i>b</i> / Å                                                                                                   | 24.404(2)                                                                       | 15.0760(16)                                                                                  | 14.058(4)                                                                                    |
| <i>c</i> / Å                                                                                                   | 13.3433(12)                                                                     | 15.4046(18)                                                                                  | 28.441(8)                                                                                    |
| $\alpha$ / deg                                                                                                 | 90                                                                              | 61.166(5)                                                                                    | 90.000                                                                                       |
| $\beta$ / deg                                                                                                  | 109.386(3)                                                                      | 71.045(5)                                                                                    | 111.043(8)                                                                                   |
| $\gamma$ / deg                                                                                                 | 90                                                                              | 80.722(5)                                                                                    | 90.000                                                                                       |
| <i>V</i> / Å <sup>3</sup>                                                                                      | 4018.3(6)                                                                       | 2064.2(4)                                                                                    | 7856(4)                                                                                      |
| <i>Z</i>                                                                                                       | 4                                                                               | 2                                                                                            | 4                                                                                            |
| $\rho_{\text{calcd}}$ / g cm <sup>-3</sup>                                                                     | 1.908                                                                           | 2.168                                                                                        | 2.062                                                                                        |
| <i>F</i> (000)                                                                                                 | 2252                                                                            | 1258                                                                                         | 4640                                                                                         |
| $\mu$ (Mo <i>K</i> $\alpha$ ) / mm <sup>-1</sup>                                                               | 4.277                                                                           | 8.068                                                                                        | 6.421                                                                                        |
| GOF on <i>F</i> <sup>2</sup>                                                                                   | 1.030                                                                           | 1.092                                                                                        | 1.021                                                                                        |
| <i>R</i> <sub>1</sub> <sup>a</sup> , <i>wR</i> <sub>2</sub> <sup>b</sup> [ <i>I</i> > 2 $\sigma$ ( <i>I</i> )] | 0.0315, 0.0896                                                                  | 0.1013, 0.2887                                                                               | 0.0374, 0.0870                                                                               |
| ( $\Delta\rho$ ) <sub>max</sub> , ( $\Delta\rho$ ) <sub>min</sub> / eÅ <sup>-3</sup>                           | 2.33, -0.9                                                                      | 11.78, -5.58                                                                                 | 2.22, -1.12                                                                                  |
| porosity                                                                                                       | 36%                                                                             | 30%                                                                                          | 27%                                                                                          |

<sup>a</sup>.  $R_1 = \sum ||F_o| - |F_c|| / \sum |F_o|$ . <sup>b</sup>.  $wR_2 = [\sum w(F_o^2 - F_c^2)^2 / \sum w(F_o^2)^2]^{1/2}$

**Table S2.** Bond lengths of **UPF-112**.

| Bond               | Lengths [Å] | Bond                | Lengths [Å] |
|--------------------|-------------|---------------------|-------------|
| U1=O13             | 1.771(3)    | P2-O4 <sup>HP</sup> | 1.541(3)    |
| U1=O14             | 1.773(3)    | P2-O5 <sup>HP</sup> | 1.546(4)    |
| U1-O1              | 2.354(3)    | P2=O6               | 1.484(3)    |
| U1-O12A            | 2.354(3)    | P3-O7 <sup>HP</sup> | 1.556(3)    |
| U1-O6B             | 2.361(3)    | P3-O8 <sup>HP</sup> | 1.516(3)    |
| U1-O9C             | 2.371(3)    | P3-O9               | 1.506(3)    |
| U1-O1w             | 2.594(4)    | P4-O10              | 1.549(4)    |
| P1-O1              | 1.501(3)    | P4-O11              | 1.519(4)    |
| P1=O2              | 1.496(3)    | P4-O12              | 1.515(3)    |
| P1-O3 <sup>P</sup> | 1.582(4)    |                     |             |

Symmetric codes for **UPF-112**: A:  $1/2+x, 3/2-y, 1/2+z$ ; B:  $3/2-x, 1/2+y, 3/2-z$ ; C:  $x, y, 1+z$ . <sup>P</sup>: the oxygen atom is protonated. <sup>HP</sup>: the oxygen atom is half protonated.

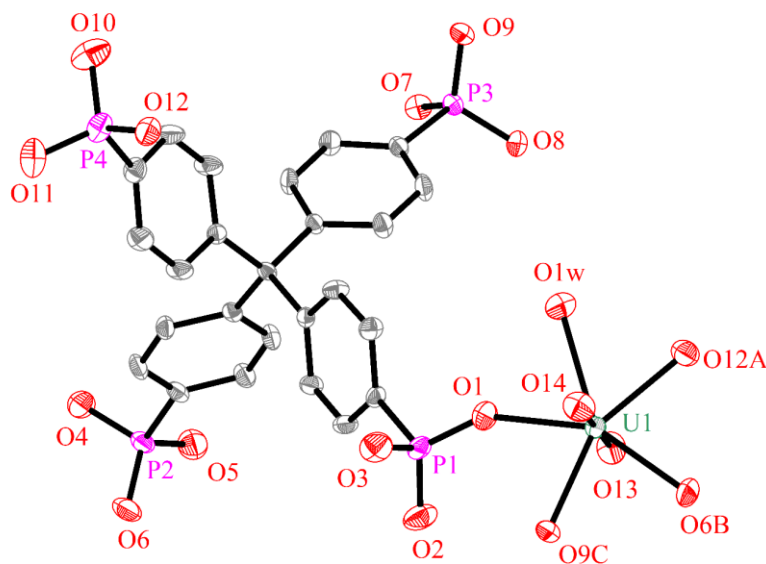**Figure S2.** Asymmetric building unit of **UPF-112** with atomic labeling scheme at 50% probability. All hydrogen atoms and 4,4'-bpy molecules are omitted for clarity.

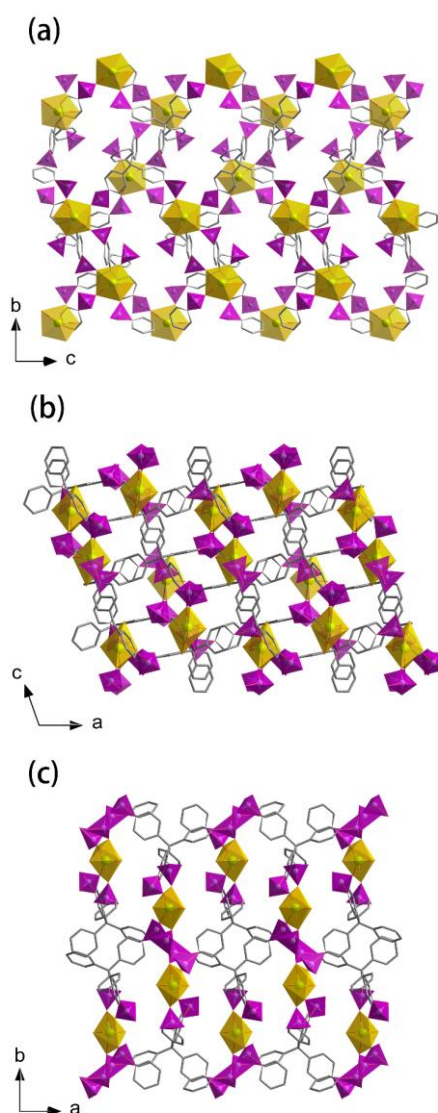

**Figure S3.** Crystal framework structures of **UPF-112** (a, b, and c), viewed along *a*, *b*, and *c* axis, respectively.  $\text{UO}_7$  is represented by the yellow pentagonal bipyramid, while  $-\text{CPO}_3$  is represented as a purple tetrahedron, and the guest molecules are omitted for clarity.

**UPF-112** crystallizes in the monoclinic space group  $P2_1/n$ . The asymmetric unit contains one  $\text{UO}_2^{2+}$  cation, one  $\text{TppmH}_8$ , one and a half 4,4'-bpy, one coordinated water molecule, and two lattice water molecules (Fig. S2).  $\text{UO}_2^{2+}$  cation adopts a pentagonal bipyramid coordination geometry, forming  $\text{UO}_7$  units. O1, O1w, O12A, O6B, and O9C are in the equatorial plane (Figs. S3a-S3c). The bond lengths of  $\text{U}=\text{O}$  and  $\text{U}-\text{O}$  are in the range of 1.771(3)-1.773(3) Å and 2.354(3)-2.371(3) Å, respectively. The bond length of  $\text{U1}-\text{O1w}$  is 2.594(4) Å, which is longer than other bonds between uranium atoms and coordinated water molecules.  $\text{UO}_7$  units act as zero-dimensional secondary building units (0D-SBU) connecting four  $\text{TppmH}_8$  ligands to give porous 3D frameworks with 4,4'-bpy molecules filled inside (Figs. S3a and S3b). 4,4'-bpy molecules are part or fully protonated to balance the charge, forming hydrogen bonds with the phosphonate groups in the framework structure. The P-O bond lengths in the range of 1.496(3)-1.516(3) Å (1.496(3) Å of P1-O2, 1.484(3) Å of P2-O6, 1.506(3) Å of P3-O9, 1.515(3) Å of P4-O12) are assigned to  $\text{P}=\text{O}$  groups. The bond length of P1-O3, P2-O4, P2-O5, P3-O7, and P4-O10 is 1.582(4) Å, 1.541(3) Å, 1.546(4) Å, 1.556(3) Å, and 1.549(4) Å, respectively, showing that O3 is fully protonated and the other oxygen atoms are half protonated (Table S2).

**Table S3.** Bond lengths of **UPF-113**.

| Bond    | Lengths [Å] | Bond                 | Lengths [Å] |
|---------|-------------|----------------------|-------------|
| U1=O13  | 1.783(15)   | U3-O7E               | 2.338(18)   |
| U1=O13J | 1.783(16)   | U3-O10               | 2.40(2)     |
| U1-O1   | 2.242(17)   | U3-O1w               | 2.54(2)     |
| U1-O1J  | 2.242(17)   | P1-O1                | 1.502(18)   |
| U1-O6A  | 2.308(17)   | P1-O2                | 1.534(19)   |
| U1-O6K  | 2.308(17)   | P1-O3                | 1.527(17)   |
| U2=O14  | 1.797(19)   | P2-O4                | 1.50(2)     |
| U2=O14I | 1.797(19)   | P2-O5 <sup>P</sup>   | 1.56(2)     |
| U2-O2B  | 2.180(18)   | P2-O6                | 1.51(2)     |
| U2-O2G  | 2.180(18)   | P3-O7                | 1.485(18)   |
| U2-O4   | 2.24(2)     | P3-O9                | 1.517(16)   |
| U2-O4I  | 2.24(2)     | P3-O8 <sup>P</sup>   | 1.590(18)   |
| U3=O15  | 1.77(2)     | P4-O10               | 1.508(17)   |
| U3=O16  | 1.79(2)     | P4-O11 <sup>HP</sup> | 1.541(18)   |
| U3-O3C  | 2.312(16)   | P4-O12 <sup>HP</sup> | 1.518(17)   |
| U3-O9D  | 2.32(2)     |                      |             |

Symmetric codes for **UPF-113**: A: 2-x, 1-y, 1-z; B: x, 1+y, z; C: x, y, 1+z; D: 1-x, 1-y, 2-z; E: 1+x, y, z; G: 1-x, 1-y, 1-z; I: 1-x, 2-y, 1-z; J: 2-x, -y, 1-z; K: x, -1+y, z. <sup>P</sup>: the oxygen atom is protonated. <sup>HP</sup>: the oxygen atom is half protonated.

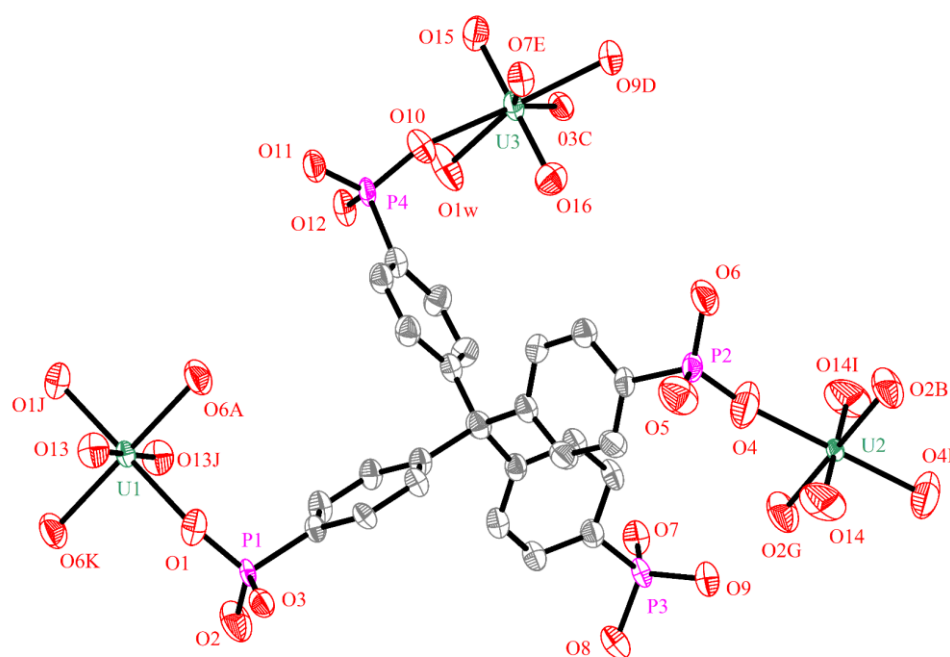**Figure S4.** Asymmetric building unit of **UPF-113** with atomic labelling scheme at 50% probability. All hydrogen atoms and 2,2'-bpy molecules are omitted for clarity.

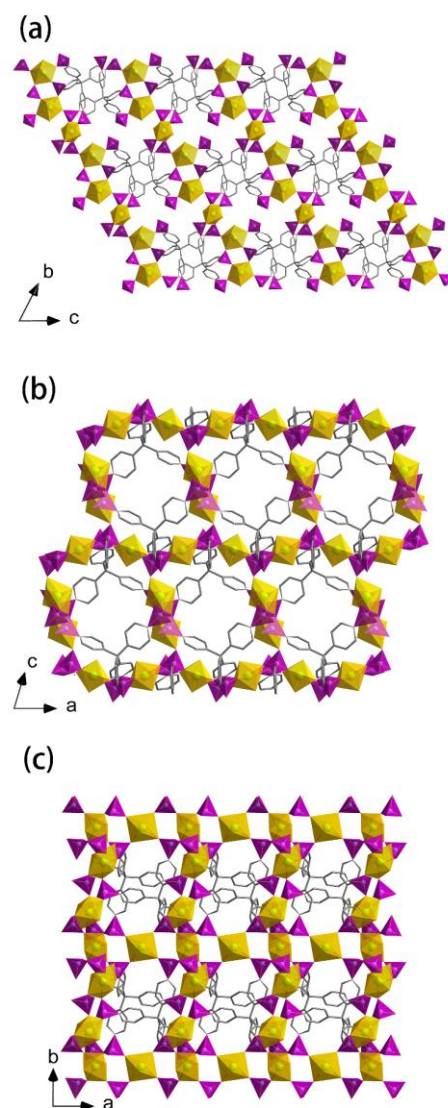

**Figure S5.** Crystal framework structures of **UPF-113** (a, b, and c), viewed along *a*, *b*, and *c* axis, respectively.  $\text{UO}_6$  and  $\text{UO}_7$  are represented by the yellow tetragonal bipyramid and pentagonal bipyramid, while  $-\text{CPO}_3$  is represented as a purple tetrahedron, and the guest molecules are omitted for clarity.

**UPF-113** crystallizes in the triclinic space group  $P\bar{1}$ . The asymmetric unit contains one and two half  $\text{UO}_2^{2+}$  cations, which are crystallography different, one  $\text{TppmH}_8$  ligand, two half 2,2'-bpy molecules, one coordinated water molecule, and one lattice water molecule (Fig. S4†). As presented in Figure 1d-1f,  $\text{UO}_2^{2+}$  cations adopt tetragonal and pentagonal bipyramid coordination geometry, respectively. The bond lengths of  $\text{U}=\text{O}$  and  $\text{U}-\text{O}$  are in the range of 1.77(2)-1.797(2) Å and 2.18(2)-2.40(2) Å, respectively. And the bond length of  $\text{U3}-\text{O1w}$  is 2.54(2) Å. For  $\text{U1}$  and  $\text{U2}$  in  $\text{UO}_6$  units, four oxygen atoms located at the equatorial plane are provided by four  $\text{TppmH}_8$  ligands and 1D- SBUs are achieved along the *a* axis consisting of  $\text{U1}$  and  $\text{U2}$  in  $\text{UO}_6$  units arranged alternatively. For  $\text{U3}$ ,  $\text{O3C}$ ,  $\text{O9D}$ ,  $\text{O7E}$ ,  $\text{O10}$ , and  $\text{O1w}$  are located in the equatorial plane, forming the  $\text{UO}_7$  cluster.  $\text{UO}_7$  units are connected by  $\text{TppmH}_8$  ligands, giving porous layers, which are further linked by 1D-SBUs to construct the final 3D structure. The bond lengths of  $\text{P2}-\text{O5}$ ,  $\text{P3}-\text{O8}$ ,  $\text{P4}-\text{O11}$ , and  $\text{P4}-\text{O12}$  are in the range of 1.52(2)-1.59(2) Å, showing that  $\text{O5}$  is protonated and the other oxygen atoms are half protonated (Table S3†).

**Table S4.** Bond lengths of **UPF-114**.

| Bond    | Lengths [Å] | Bond                | Lengths [Å] |
|---------|-------------|---------------------|-------------|
| U1=O13  | 1.760(4)    | P1-O2               | 1.497(4)    |
| U1=O13E | 1.761(4)    | P1-O3 <sup>P</sup>  | 1.549(4)    |
| U1-O2   | 2.278(4)    | P2-O4               | 1.515(4)    |
| U1-O2E  | 2.278(4)    | P2-O5 <sup>P</sup>  | 1.567(4)    |
| U1-O10A | 2.294(4)    | P2-O6               | 1.502(4)    |
| U1-O10F | 2.294(4)    | P3-O7               | 1.494(4)    |
| U2=O15  | 1.777(4)    | P3-O8               | 1.511(4)    |
| U2=O14  | 1.788(4)    | P3-O9 <sup>P</sup>  | 1.551(4)    |
| U2-O4B  | 2.243(4)    | P4-O10              | 1.503(4)    |
| U2-O7C  | 2.256(4)    | P4-O11              | 1.496(4)    |
| U2-O8D  | 2.295(4)    | P4-O12 <sup>P</sup> | 1.578(4)    |
| P1-O1   | 1.498(4)    |                     |             |

Symmetric codes for **UPF-114** : A: x, -1+y, z; B: 1/2-x, -1/2-y, -z; C: 1/2-x, -1/2+y, -1/2-z; D: x, -1-y, 1/2+z; E: -x, y, -1/2-z; F: -x, -1+y, -1/2-z. <sup>P</sup>: the oxygen atom is protonated. <sup>HP</sup>: the oxygen atom is half protonated.

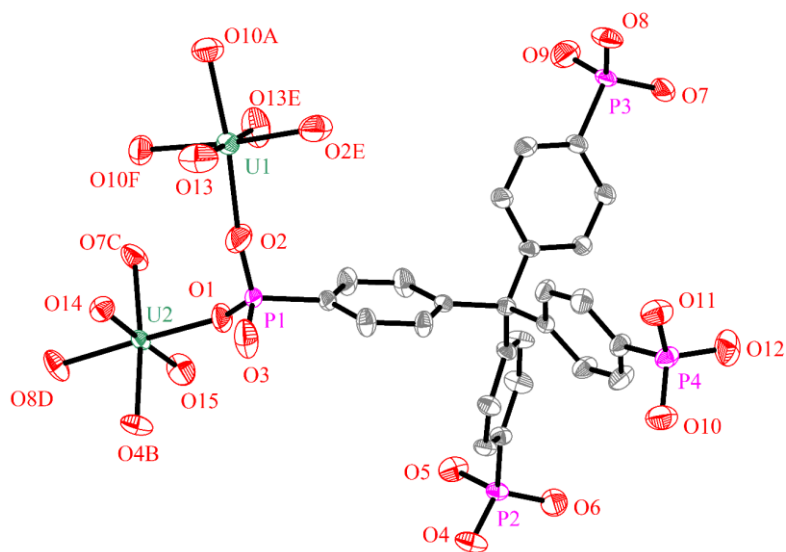**Figure S6.** Asymmetric building unit of **UPF-114** with atomic labeling scheme at 50% probability. All hydrogen atoms and phen molecules are omitted for clarity.

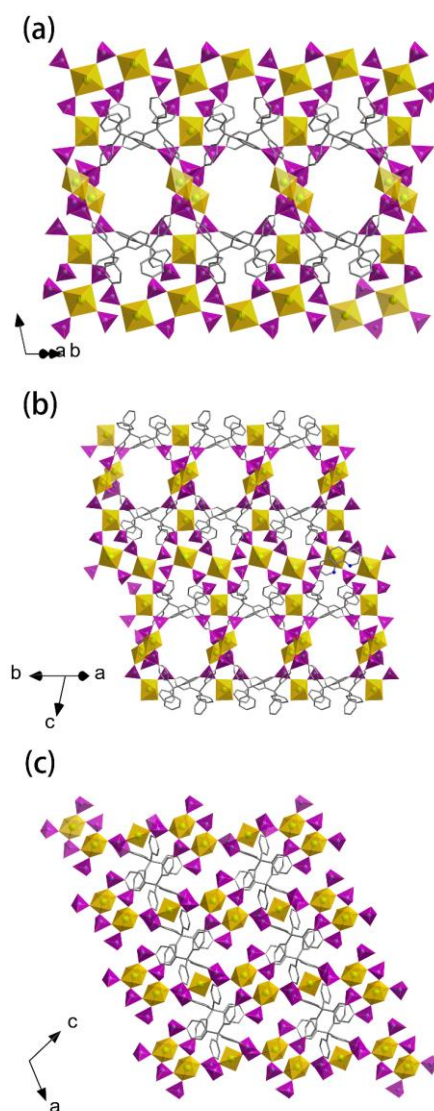

**Figure S7.** Crystal framework structures of **UPF-114** (a, b, and c), viewed along *a*, *b*, and *c* axis, respectively.  $\text{UO}_6$  is represented by the yellow tetragonal bipyramid, while  $-\text{CPO}_3$  is represented as a purple tetrahedron, and the guest molecules are omitted for clarity.

**UPF-114** crystallizes in the monoclinic space group  $C2/c$ . The asymmetric unit contains one and a half  $\text{UO}_2^{2+}$  cations, one  $\text{TppmH}_8$  ligand, and one phen molecule (Fig. S6).  $\text{U1O}_6$  and  $\text{U2O}_6$  units adopt tetragonal bipyramid coordination geometry, and four different  $\text{TppmH}_8$  ligands provide four oxygen atoms in the equatorial plane. The bond lengths of  $\text{U}=\text{O}$  and  $\text{U}-\text{O}$  are in the range of 1.760(4)–1.788(4) Å and 2.243(4)–2.295(4) Å, respectively. One  $\text{U1O}_6$  and two  $\text{U2O}_6$  units are connected to give a trimer by corner-sharing of phosphonate groups, acting as OD-node, further linked by  $\text{TppmH}_8$ , forming a porous 3D-MOF structure. To balance the charge, the protonated phen cations are filled in the space of the structure. **UPF-114** has two kinds of channels that are not crosslinked (Figs. S7a–S7c). The bond lengths of  $\text{P}-\text{O}$  are in the range of 1.494(4)–1.578(4) Å. The bond lengths of  $\text{P1}-\text{O3}$ ,  $\text{P2}-\text{O5}$ ,  $\text{P3}-\text{O9}$ , and  $\text{P4}-\text{O12}$  are 1.549(4), 1.567(4), 1.551(4), and 1.578(4) Å, respectively, which belong to  $\text{P}-\text{O}-\text{H}$  (Table S4).

### 1.3 Analysis of Weak Interaction

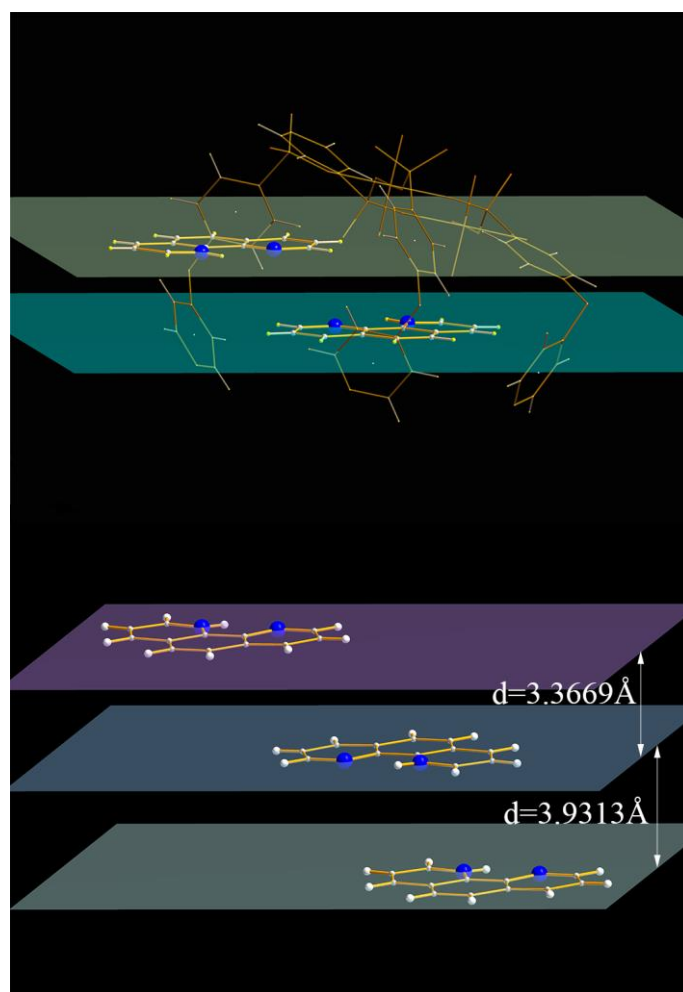

**Figure S8.**  $\pi$ - $\pi$  interaction between guest molecules in the framework of **UPF-114**.

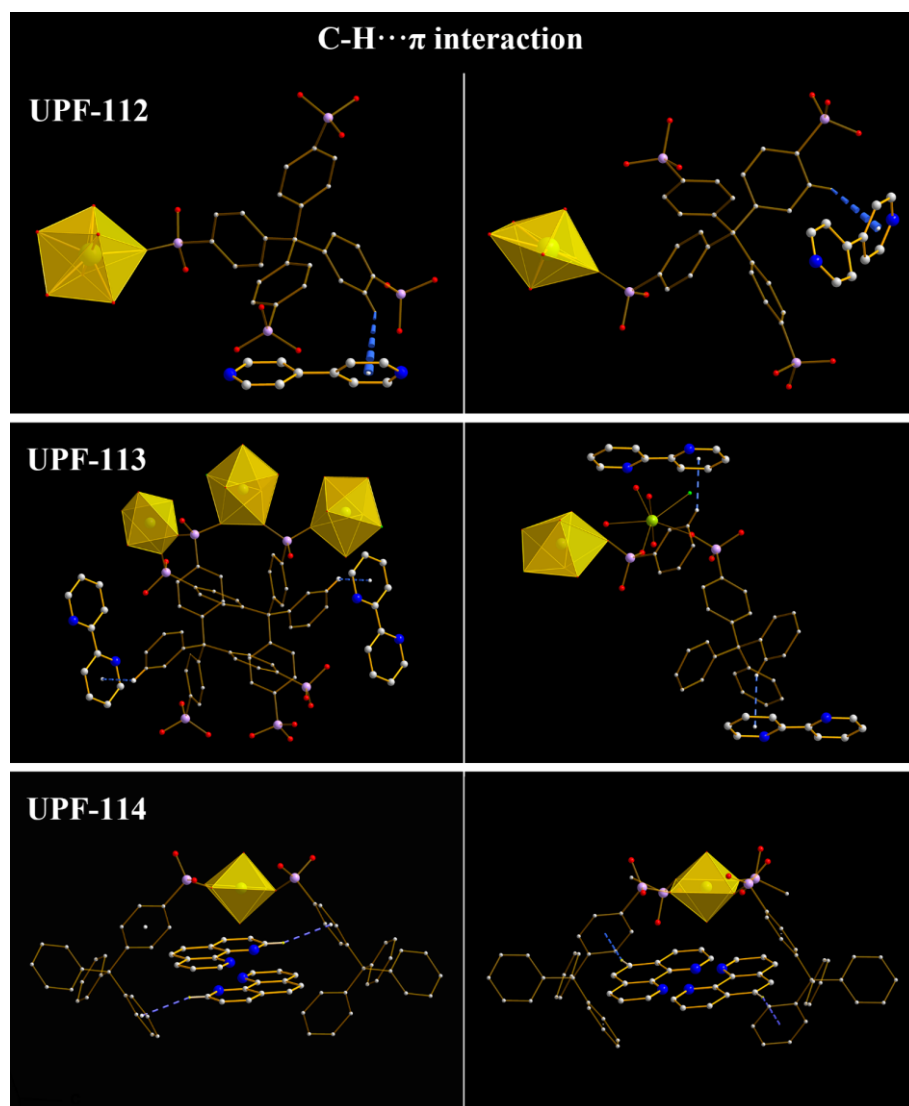

**Figure S9.** C-H $\cdots\pi$  interactions (blue dash line) between guest and framework.  $\text{UO}_6$  and  $\text{UO}_7$  are represented by the yellow tetragonal bipyramid and pentagonal bipyramid, and the hydrogen atoms are omitted for clarity.

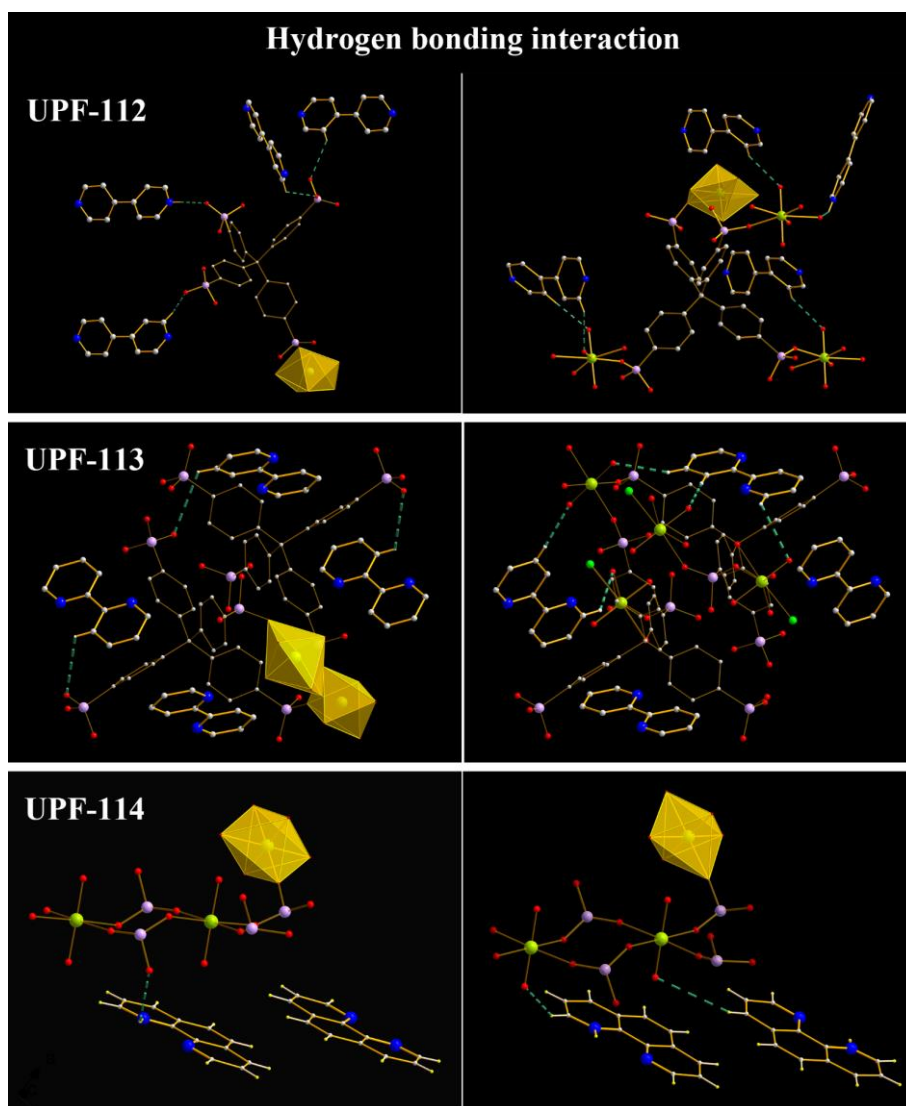

**Figure S10.** Hydrogen bonding interactions (green dash line) between guest and framework.  $\text{UO}_6$  and  $\text{UO}_7$  are represented by the yellow tetragonal bipyramid and pentagonal bipyramid, and the hydrogen atoms are omitted for clarity.

**Table S5.** Bond lengths and bond angles for weak interaction forces between guest molecules and frameworks in **UPF-112**, **UPF-113**, and **UPF-114**.

| Species | $\pi$ - $\pi$ interaction | C-H $\cdots\pi$ interactions | hydrogen bonding interaction       |            |
|---------|---------------------------|------------------------------|------------------------------------|------------|
|         | bond length               | bond length                  | bond length                        | bond angle |
| UPF-112 |                           |                              | d(P1-O2 $\cdots$ H36) = 2.6170Å    | 131°       |
|         |                           |                              | d(P1-O3 $\cdots$ H29) = 2.9000Å    | 131°       |
|         |                           |                              | d(P2-O4 $\cdots$ H30) = 2.3305Å    | 141°       |
|         |                           | d(H14- $\pi$ ) = 3.1796Å     | d(P4-O11 $\cdots$ H1-N1) = 1.9397Å | 133°       |
|         |                           | d(H18- $\pi$ ) = 3.1021Å     | d(U1-O1w $\cdots$ H26) = 2.7369Å   | 129°       |
|         |                           | d(H24- $\pi$ ) = 2.8341Å     | d(U1-O13 $\cdots$ H34) = 2.5025Å   | 131°       |
|         |                           |                              | d(U1-O12 $\cdots$ H3) = 2.8213Å    | 114°       |
|         |                           |                              | d(U1-O14 $\cdots$ H32) = 2.8293Å   | 123°       |
| UPF-113 |                           |                              | d(P4-O12 $\cdots$ H27) = 3.7923Å   | 135°       |
|         |                           |                              | d(P1-O3 $\cdots$ H33) = 3.4168Å    | 106°       |
|         |                           | d(H15- $\pi$ ) = 2.8274Å     | d(U2-O14 $\cdots$ H28) = 2.4705Å   | 156°       |
|         |                           | d(H20- $\pi$ ) = 3.6250Å     | d(U3-O10 $\cdots$ H30) = 2.7621Å   | 97°        |
|         |                           |                              | d(U3-O16 $\cdots$ H32) = 1.9388Å   | 144°       |
|         |                           |                              | d(U3-O14 $\cdots$ H33) = 2.7233Å   | 123°       |
| UPF-114 |                           |                              | d(U3-O15 $\cdots$ H35) = 3.0838Å   | 100°       |
|         | d <sub>1</sub> =3.3669Å   | d(H26- $\pi$ ) = 2.9604Å     | d(N2-H2 $\cdots$ O8-P) = 3.3631Å   | 130°       |
|         | d <sub>2</sub> =3.9313Å   | d(H31- $\pi$ ) = 3.0568Å     | d(U2-O14 $\cdots$ H37) = 2.3336Å   | 130°       |
|         |                           | d(H35- $\pi$ ) = 3.2510Å     | d(U2-O15 $\cdots$ H28) = 3.6199Å   | 100°       |

## 1.4 Powder X-ray Diffraction

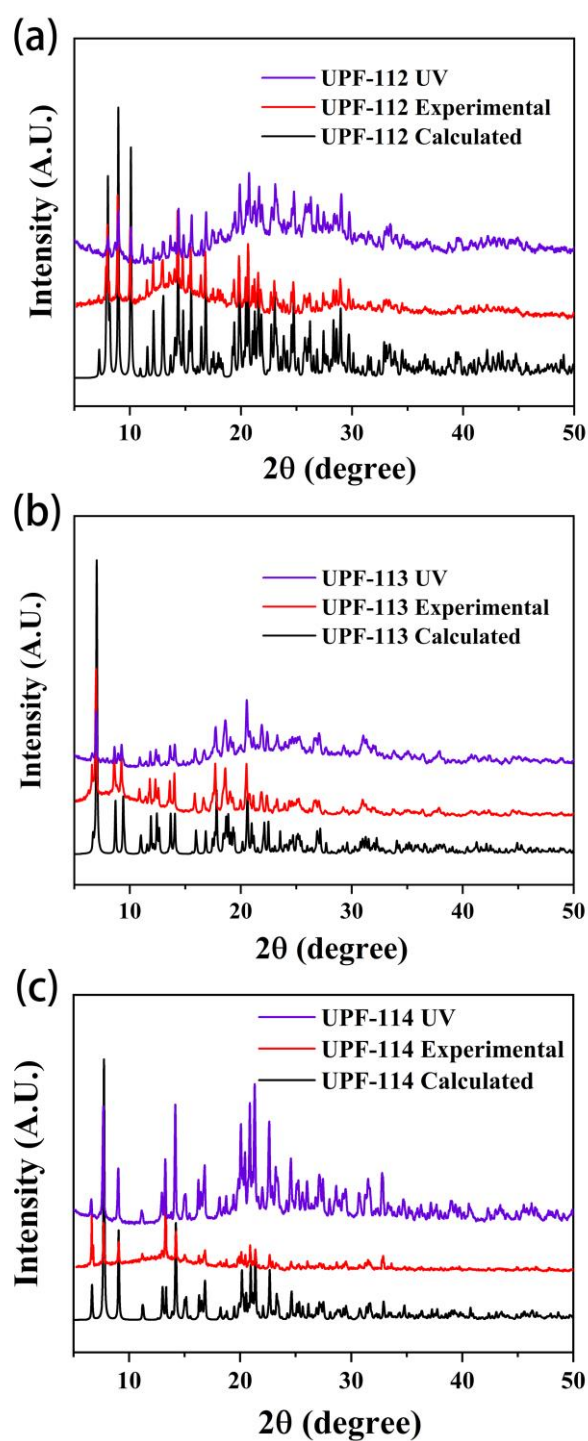

**Figure S11.** Powder X-ray diffraction (PXRD) patterns of calculated (black), experimental (red) and UV irradiated (violet) for **UPF-112**, **UPF-113** and **UPF-114**.

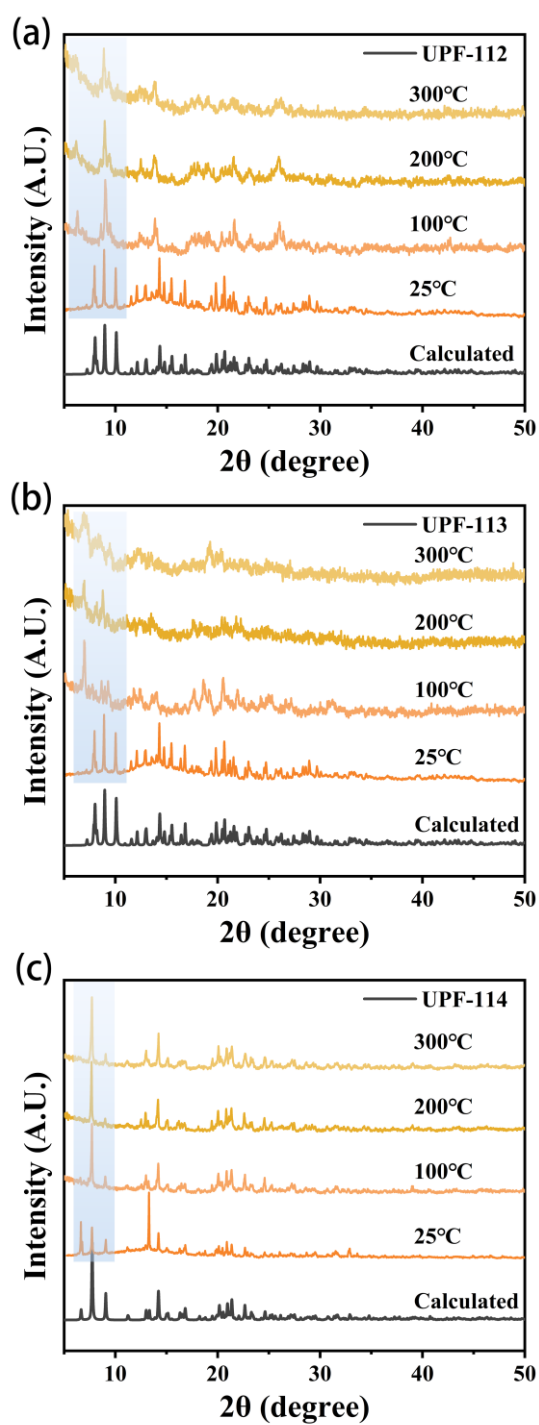

**Figure S12.** Ex-situ variable temperature powder X-ray diffraction (VT-PXRD) patterns of (a) **UPF-112**, (b) **UPF-113**, and (c) **UPF-114** taken with a Cu K $\alpha$  radiation source.

## 1.5 IR and Raman Spectra

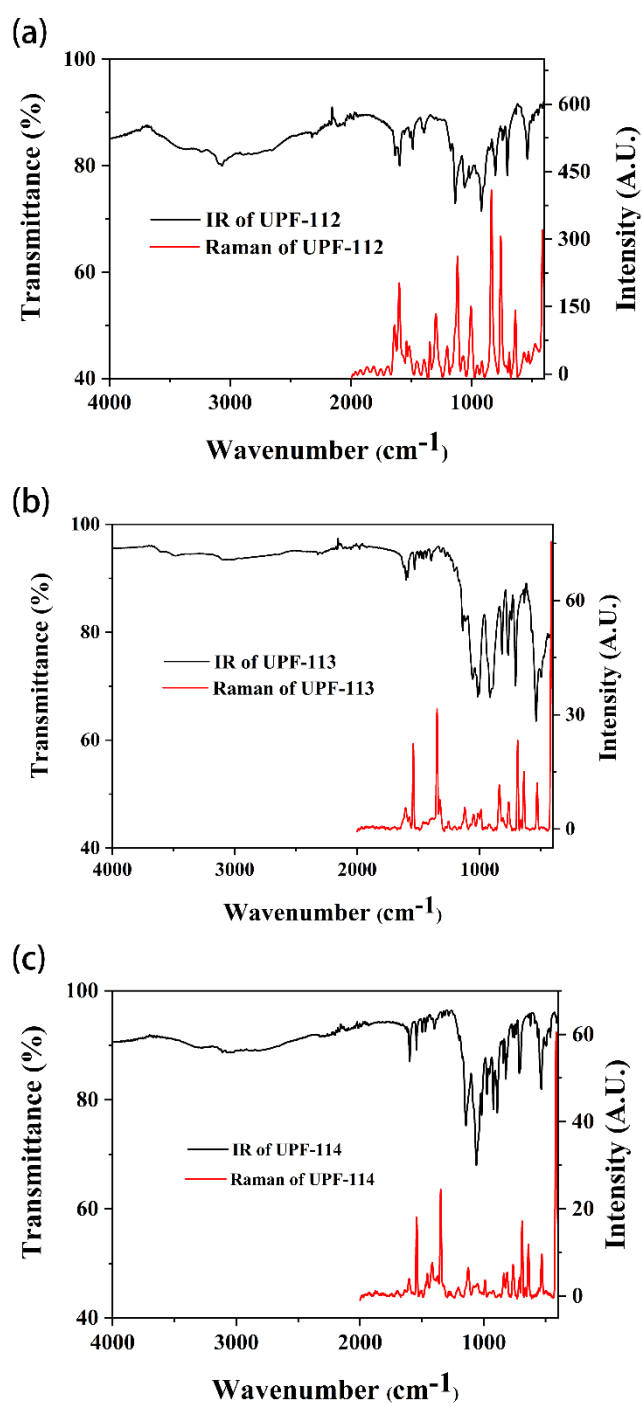

**Figure S13.** IR and Raman spectra of (a) UPF-112, (b) UPF-113, (c)UPF-114.

## 1.6 Thermal Gravimetric Analysis

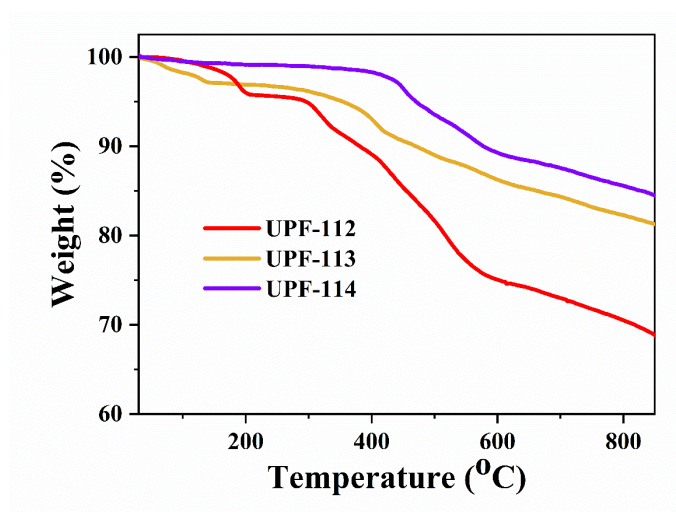

**Figure S14.** TG patterns of **UPF-112** (red), **UPF-113** (yellow), and **UPF-114** (violet).

**UPF-112** started to lose two lattice water molecules and one coordinated water molecule above 120 °C, demonstrating a platform during 200-300 °C. The average weight loss is 4.44 %, similar to a calculated weight loss of 4.52 %. The lattice water molecules of **UPF-113** started to lose with the temperature increase and lost 1.35 % of total weight at 80 °C, similar to the 1.32% calculated by the formula. The aqua ligands of **UPF-113** are removed completely at 135 °C, and the weight loss is 2.72 %, similar to the calculated 2.63 %.

## 1.7 UV-vis Absorption Spectra

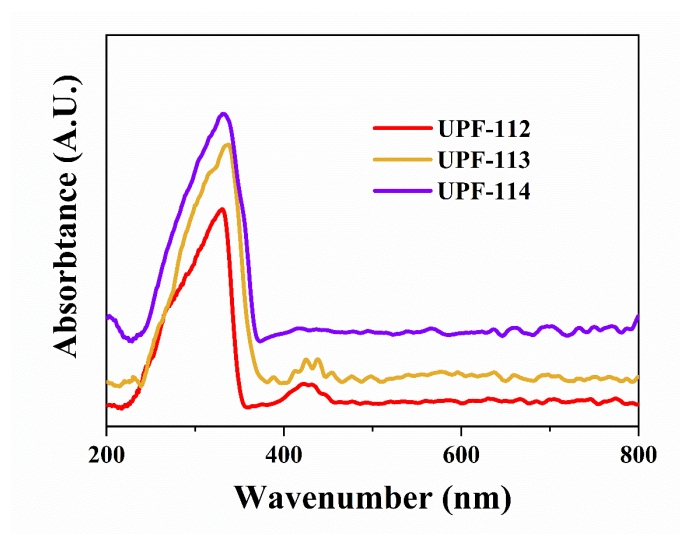

**Figure S15.** UV-vis absorption spectrum of **UPF-112** (red line), **UPF-113** (yellow line), and **UPF-114** (violet line).

## 1.8 Photoluminescence Spectra and Fluorescence Quenching Curves

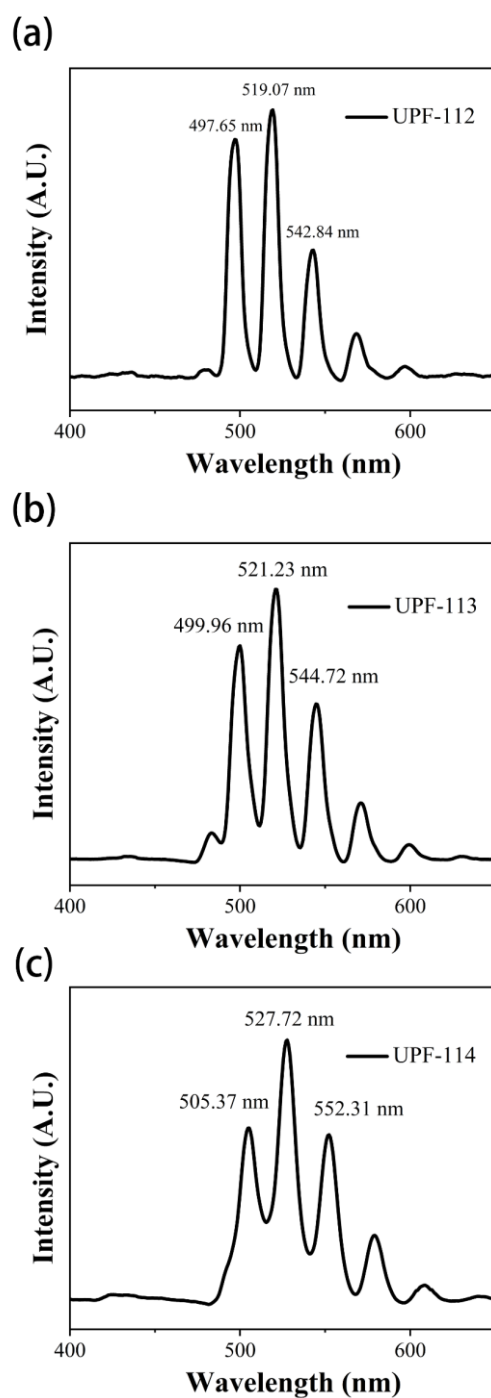

**Figure S16.** Photoluminescence spectra of **UPF-112**, **UPF-113** and **UPF-114** measured at room temperature.

**Table S6.** Quenching of **UPF-112** at a peak of 497.65 nm measured at room temperature.

| Time (min) | Time (s) | Dosage (mJ)            | (I <sub>0</sub> -I)/I <sub>0</sub> % |
|------------|----------|------------------------|--------------------------------------|
| 0          | 0        | 0                      | 0                                    |
| 1          | 60       | $2.252 \times 10^{-6}$ | 12.44                                |
| 3          | 180      | $6.755 \times 10^{-6}$ | 24.51                                |
| 5          | 300      | $1.126 \times 10^{-5}$ | 31.80                                |
| 10         | 600      | $2.252 \times 10^{-5}$ | 42.01                                |
| 20         | 1200     | $4.503 \times 10^{-5}$ | 51.76                                |
| 30         | 1800     | $6.755 \times 10^{-5}$ | 57.82                                |
| 45         | 2700     | $1.013 \times 10^{-4}$ | 62.34                                |
| 60         | 3600     | $1.351 \times 10^{-4}$ | 65.67                                |
| 90         | 5400     | $2.026 \times 10^{-4}$ | 69.82                                |
| 150        | 9000     | $3.39 \times 10^{-4}$  | 73.93                                |
| 180        | 10800    | $4.053 \times 10^{-4}$ | 75.42                                |

**Table S7.** Quenching of **UPF-112** at a peak of 519.07 nm measured at room temperature.

| Time (min) | Time (s) | Dosage (mJ)            | (I <sub>0</sub> -I)/I <sub>0</sub> % |
|------------|----------|------------------------|--------------------------------------|
| 0          | 0        | 0                      | 0                                    |
| 1          | 60       | $2.252 \times 10^{-6}$ | 13.799                               |
| 3          | 180      | $6.755 \times 10^{-6}$ | 26.83                                |
| 5          | 300      | $1.126 \times 10^{-5}$ | 34.24                                |
| 10         | 600      | $2.252 \times 10^{-5}$ | 44.78                                |
| 20         | 1200     | $4.503 \times 10^{-5}$ | 54.69                                |
| 30         | 1800     | $6.755 \times 10^{-5}$ | 60.72                                |
| 45         | 2700     | $1.013 \times 10^{-4}$ | 65.34                                |
| 60         | 3600     | $1.351 \times 10^{-4}$ | 68.42                                |
| 90         | 5400     | $2.026 \times 10^{-4}$ | 72.37                                |
| 150        | 9000     | $3.39 \times 10^{-4}$  | 76.15                                |
| 180        | 10800    | $4.053 \times 10^{-4}$ | 77.46                                |

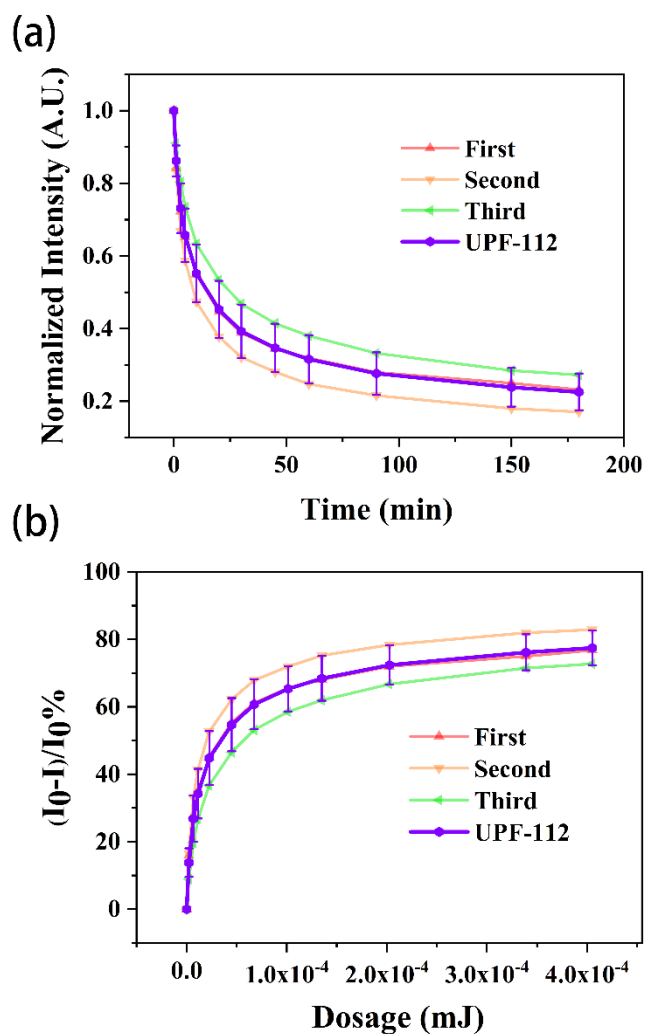**Figure S17.** (a) Normalized intensity of **UPF-112** at the peak of 519.07 nm measured at room temperature. (b) Relative fluorescence quenching of **UPF-112** at a peak of 519.07 nm.

**Table S8.** Quenching of **UPF-112** at a peak of 542.84 nm measured at room temperature.

| Time (min) | Time (s) | Dosage (mJ)            | (I <sub>0</sub> -I)/I <sub>0</sub> % |
|------------|----------|------------------------|--------------------------------------|
| 0          | 0        | 0                      | 0                                    |
| 1          | 60       | 2.252×10 <sup>-6</sup> | 14.80                                |
| 3          | 180      | 6.755×10 <sup>-6</sup> | 28.39                                |
| 5          | 300      | 1.126×10 <sup>-5</sup> | 35.87                                |
| 10         | 600      | 2.252×10 <sup>-5</sup> | 46.20                                |
| 20         | 1200     | 4.503×10 <sup>-5</sup> | 55.96                                |
| 30         | 1800     | 6.755×10 <sup>-5</sup> | 61.74                                |
| 45         | 2700     | 1.013×10 <sup>-4</sup> | 66.48                                |
| 60         | 3600     | 1.351×10 <sup>-4</sup> | 69.01                                |
| 90         | 5400     | 2.026×10 <sup>-4</sup> | 72.71                                |
| 150        | 9000     | 3.39×10 <sup>-4</sup>  | 76.11                                |
| 180        | 10800    | 4.053×10 <sup>-4</sup> | 77.58                                |

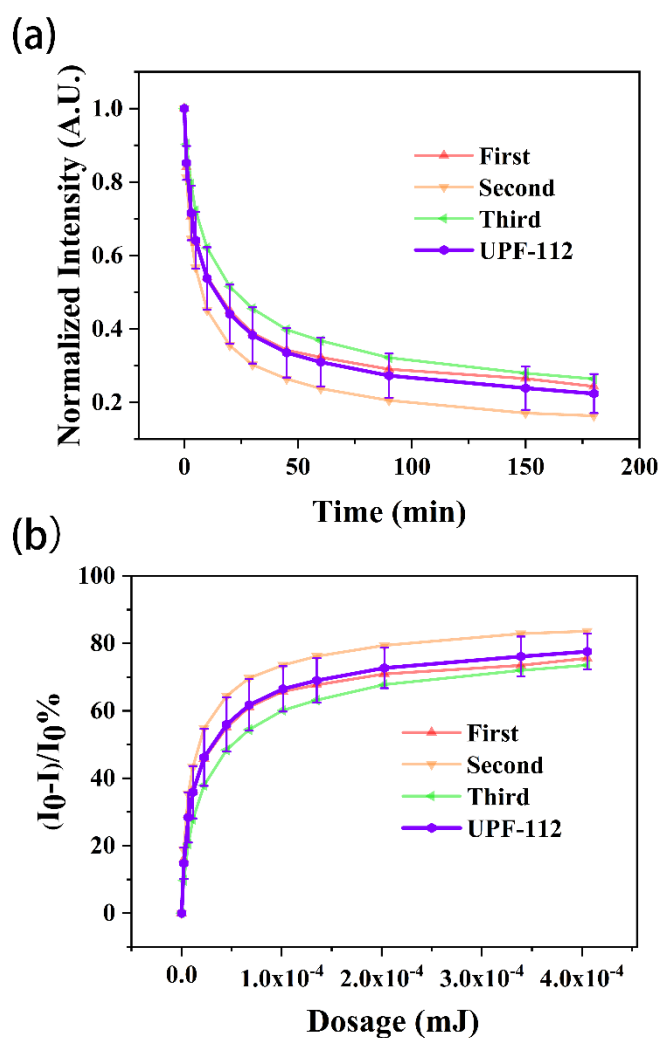**Figure S18.** (a) Normalized intensity of **UPF-112** at the peak of 542.84 nm measured at room temperature. (b) Relative fluorescence quenching of **UPF-112** at a peak of 542.84 nm.

**Table S9.** Quenching of **UPF-113** at a peak of 499.96 nm measured at room temperature.

| Time (min) | Time (s) | Dosage (mJ)            | (I <sub>0</sub> -I)/I <sub>0</sub> % |
|------------|----------|------------------------|--------------------------------------|
| 0          | 0        | 0                      | 0                                    |
| 1          | 60       | 2.252×10 <sup>-6</sup> | 18.49                                |
| 3          | 180      | 6.755×10 <sup>-6</sup> | 30.93                                |
| 5          | 300      | 1.126×10 <sup>-5</sup> | 39.27                                |
| 10         | 600      | 2.252×10 <sup>-5</sup> | 50.93                                |
| 20         | 1200     | 4.503×10 <sup>-5</sup> | 63.93                                |
| 30         | 1800     | 6.755×10 <sup>-5</sup> | 70.80                                |
| 45         | 2700     | 1.013×10 <sup>-4</sup> | 77.47                                |
| 60         | 3600     | 1.351×10 <sup>-4</sup> | 80.93                                |
| 90         | 5400     | 2.026×10 <sup>-4</sup> | 85.96                                |
| 150        | 9000     | 3.39×10 <sup>-4</sup>  | 88.09                                |
| 180        | 10800    | 4.053×10 <sup>-4</sup> | 90.29                                |

**Table S10.** Quenching of **UPF-113** at a peak of 521.23 nm measured at room temperature.

| Time (min) | Time (s) | Dosage (mJ)            | (I <sub>0</sub> -I)/I <sub>0</sub> % |
|------------|----------|------------------------|--------------------------------------|
| 0          | 0        | 0                      | 0                                    |
| 1          | 60       | $2.252 \times 10^{-6}$ | 16.65                                |
| 3          | 180      | $6.755 \times 10^{-6}$ | 29.01                                |
| 5          | 300      | $1.126 \times 10^{-5}$ | 39.57                                |
| 10         | 600      | $2.252 \times 10^{-5}$ | 49.05                                |
| 20         | 1200     | $4.503 \times 10^{-5}$ | 61.69                                |
| 30         | 1800     | $6.755 \times 10^{-5}$ | 67.76                                |
| 45         | 2700     | $1.013 \times 10^{-4}$ | 73.92                                |
| 60         | 3600     | $1.351 \times 10^{-4}$ | 77.96                                |
| 90         | 5400     | $2.026 \times 10^{-4}$ | 82.23                                |
| 150        | 9000     | $3.39 \times 10^{-4}$  | 86.05                                |
| 180        | 10800    | $4.053 \times 10^{-4}$ | 87.34                                |

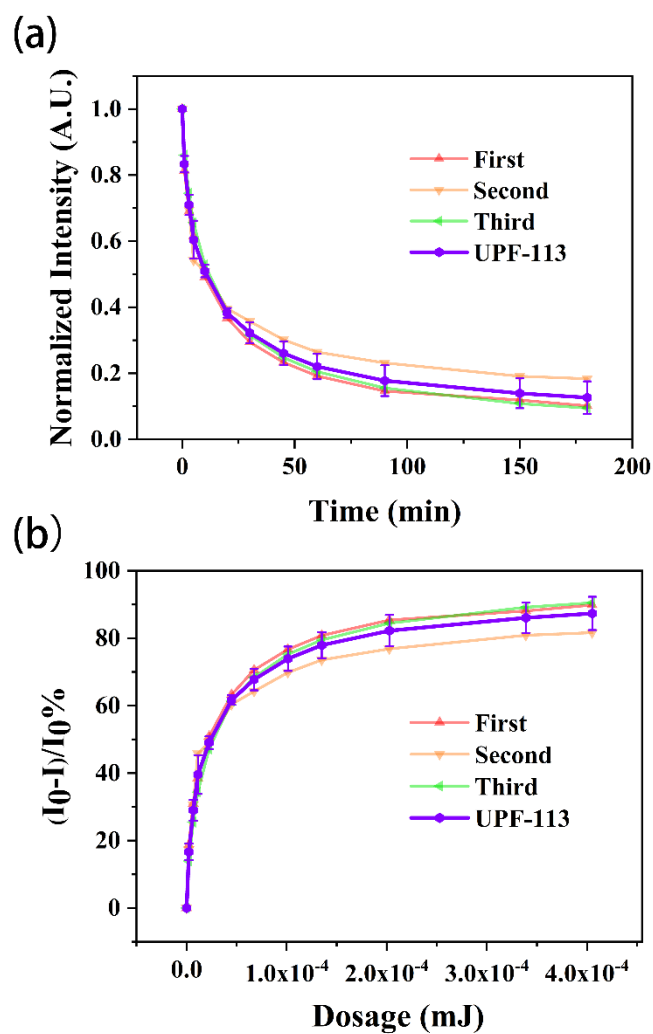**Figure S19.** (a) Normalized intensity of **UPF-113** at the peak of 521.23 nm measured at room temperature. (b) Relative fluorescence quenching of **UPF-113** at a peak of 544.72 nm.

**Table S11.** Quenching of **UPF-113** at a peak of 544.72 nm measured at room temperature.

| Time (min) | Time (s) | Dosage (mJ)            | (I <sub>0</sub> -I)/I <sub>0</sub> % |
|------------|----------|------------------------|--------------------------------------|
| 0          | 0        | 0                      | 0                                    |
| 1          | 60       | $2.252 \times 10^{-6}$ | 16.08                                |
| 3          | 180      | $6.755 \times 10^{-6}$ | 29.05                                |
| 5          | 300      | $1.126 \times 10^{-5}$ | 38.16                                |
| 10         | 600      | $2.252 \times 10^{-5}$ | 47.65                                |
| 20         | 1200     | $4.503 \times 10^{-5}$ | 60.70                                |
| 30         | 1800     | $6.755 \times 10^{-5}$ | 66.25                                |
| 45         | 2700     | $1.013 \times 10^{-4}$ | 72.35                                |
| 60         | 3600     | $1.351 \times 10^{-4}$ | 76.07                                |
| 90         | 5400     | $2.026 \times 10^{-4}$ | 79.49                                |
| 150        | 9000     | $3.39 \times 10^{-4}$  | 82.80                                |
| 180        | 10800    | $4.053 \times 10^{-4}$ | 83.86                                |

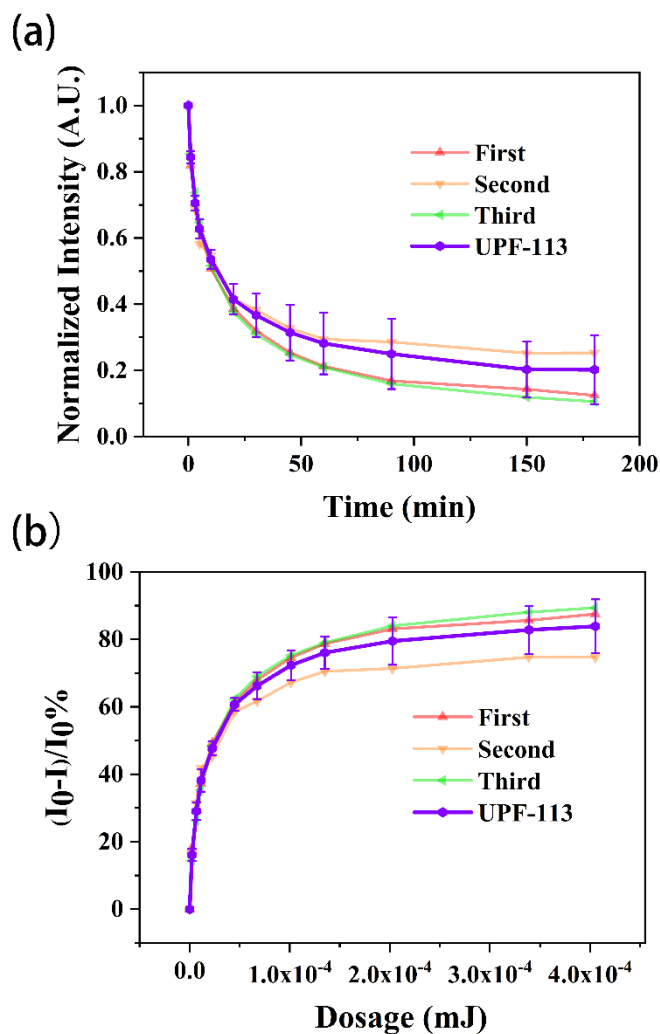**Figure S20.** (a) Normalized intensity of **UPF-113** at the peak of 544.72 nm measured at room temperature. (b) Relative fluorescence quenching of **UPF-113** at a peak of 544.72 nm.

**Table S12.** Quenching of **UPF-114** at a peak of 505.37 nm measured at room temperature.

| Time (min) | Time (s) | Dosage (mJ)            | (I <sub>0</sub> -I)/I <sub>0</sub> % |
|------------|----------|------------------------|--------------------------------------|
| 0          | 0        | 0                      | 0                                    |
| 1          | 60       | $2.252 \times 10^{-6}$ | 33.99                                |
| 3          | 180      | $6.755 \times 10^{-6}$ | 54.14                                |
| 5          | 300      | $1.126 \times 10^{-5}$ | 64.01                                |
| 10         | 600      | $2.252 \times 10^{-5}$ | 75.61                                |
| 20         | 1200     | $4.503 \times 10^{-5}$ | 84.36                                |
| 30         | 1800     | $6.755 \times 10^{-5}$ | 88.10                                |
| 45         | 2700     | $1.013 \times 10^{-4}$ | 91.03                                |
| 60         | 3600     | $1.351 \times 10^{-4}$ | 92.63                                |
| 90         | 5400     | $2.026 \times 10^{-4}$ | 94.46                                |
| 120        | 7200     | $2.701 \times 10^{-4}$ | 95.56                                |

**Table S13.** Quenching of **UPF-114** at a peak of 527.72 nm measured at room temperature.

| Time (min) | Time (s) | Dosage (mJ)            | (I <sub>0</sub> -I)/I <sub>0</sub> % |
|------------|----------|------------------------|--------------------------------------|
| 0          | 0        | 0                      | 0                                    |
| 1          | 60       | 2.252×10 <sup>-6</sup> | 33.97                                |
| 3          | 180      | 6.755×10 <sup>-6</sup> | 53.85                                |
| 5          | 300      | 1.126×10 <sup>-5</sup> | 64.02                                |
| 10         | 600      | 2.252×10 <sup>-5</sup> | 75.53                                |
| 20         | 1200     | 4.503×10 <sup>-5</sup> | 84.15                                |
| 30         | 1800     | 6.755×10 <sup>-5</sup> | 87.75                                |
| 45         | 2700     | 1.013×10 <sup>-4</sup> | 90.85                                |
| 60         | 3600     | 1.351×10 <sup>-4</sup> | 92.49                                |
| 90         | 5400     | 2.026×10 <sup>-4</sup> | 94.20                                |
| 120        | 7200     | 2.701×10 <sup>-4</sup> | 95.48                                |

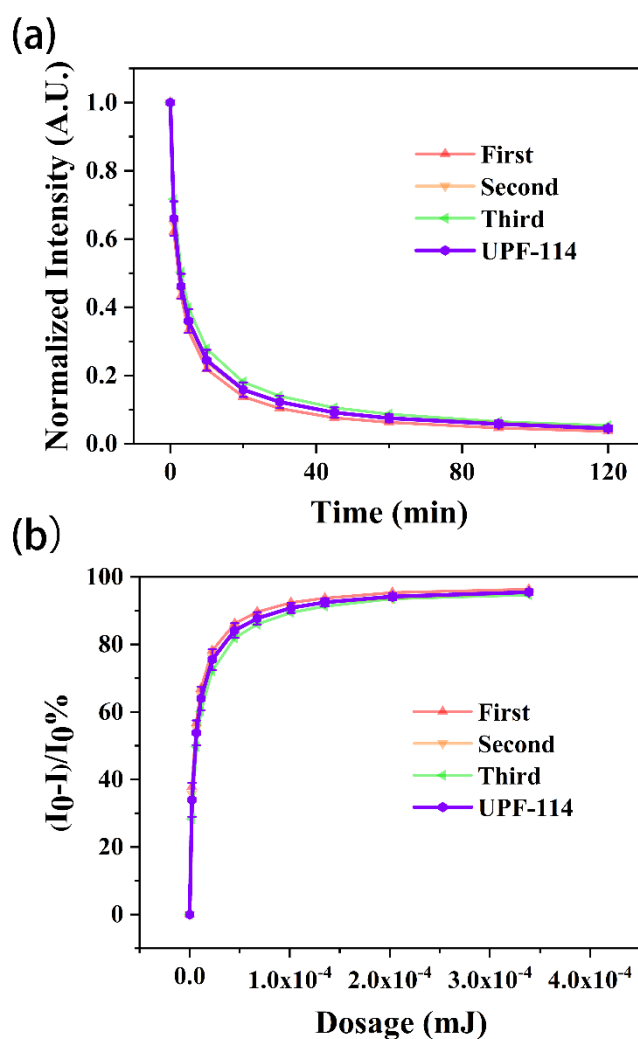**Figure S21.** (a) Normalized intensity of **UPF-114** at the peak of 527.72 nm measured at room temperature. (b) Relative fluorescence quenching of **UPF-114** at a peak of 527.72 nm.

**Table S14.** Quenching of **UPF-114** at a peak of 552.31 nm measured at room temperature.

| Time (min) | Time (s) | Dosage (mJ)            | (I <sub>0</sub> -I)/I <sub>0</sub> % |
|------------|----------|------------------------|--------------------------------------|
| 0          | 0        | 0                      | 0                                    |
| 1          | 60       | $2.252 \times 10^{-6}$ | 33.66                                |
| 3          | 180      | $6.755 \times 10^{-6}$ | 53.65                                |
| 5          | 300      | $1.126 \times 10^{-5}$ | 63.67                                |
| 10         | 600      | $2.252 \times 10^{-5}$ | 75.35                                |
| 20         | 1200     | $4.503 \times 10^{-5}$ | 83.97                                |
| 30         | 1800     | $6.755 \times 10^{-5}$ | 87.58                                |
| 45         | 2700     | $1.013 \times 10^{-4}$ | 90.33                                |
| 60         | 3600     | $1.351 \times 10^{-4}$ | 92.10                                |
| 90         | 5400     | $2.026 \times 10^{-4}$ | 93.87                                |
| 120        | 7200     | $2.701 \times 10^{-4}$ | 95.26                                |

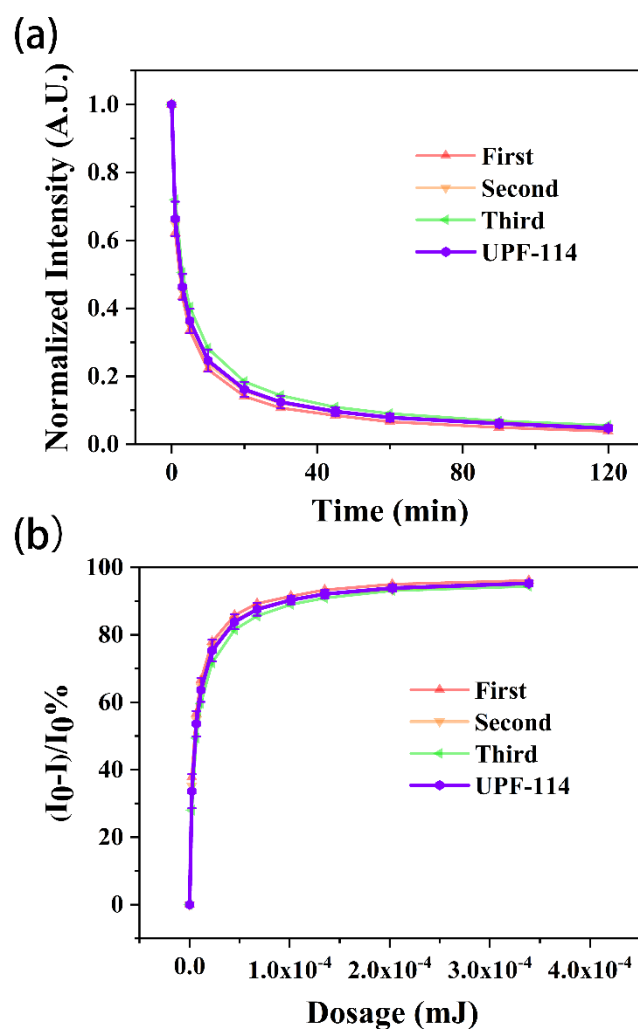**Figure S22.** (a) Normalized intensity of **UPF-114** at the peak of 552.31 nm measured at room temperature. (b) Relative fluorescence quenching of **UPF-114** at a peak of 552.31 nm.

## 1.9 Determination of detection limit

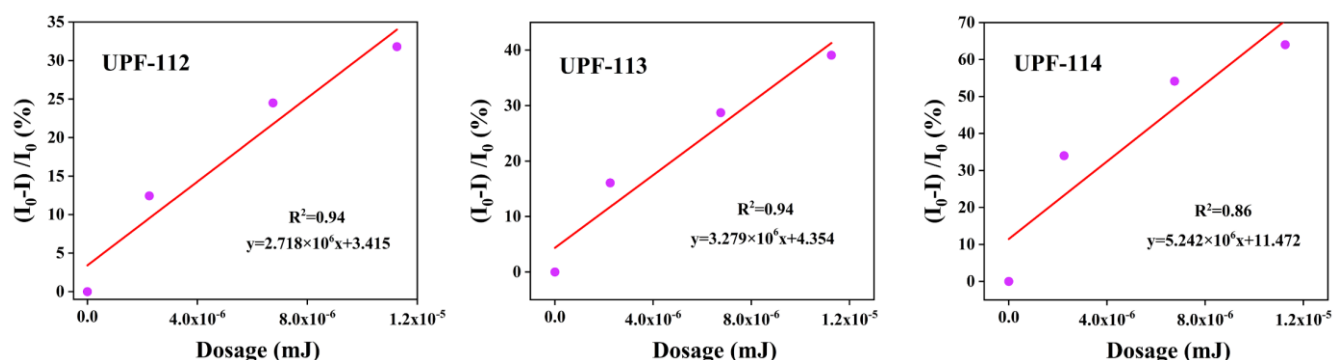

**Figure S23.** Linear fitting from data points in the low dose range ( $0 - 1.2 \times 10^{-5}$  mJ).

Based on the fluorescence measurement shown in Figure S23, the limit of the detection can be determined by the following equations:

$$DT = \frac{3\sigma}{k} \quad (1)$$

$$\sigma = 100 \times \frac{I_{SE}}{I_0} \quad (2)$$

where the detection limit is noted as **DT**;  $I_{SE}$  is the standard error of the luminescence intensity (as determined by the baseline measurement of blank samples);  $I_0$  is the measured luminescence intensity;  $k$  is the slope obtained from the linear fit in the lower dosage range of the dosage-dependent luminescence intensity calibration curve.<sup>1</sup>

On the basis of the acquired data, the detection limit of **UPF-112** was determined to be  $9.54 \times 10^{-12}$  J; the detection limit of **UPF-113** was determined to be  $5.98 \times 10^{-12}$  J; the detection limit of **UPF-114** was determined to be  $2.96 \times 10^{-12}$  J.

**Table S15.** Comparison of detection limits of ionizing radiation detectors.

| UV-detector                                                                                                                | ionizing radiation  | intensity decay to half ( $T_{1/2}$ ) | limit of detection (LOD) | Reference    |
|----------------------------------------------------------------------------------------------------------------------------|---------------------|---------------------------------------|--------------------------|--------------|
| 4,4'-di(1H-phenanthro[9,10-d]imidazol-2-yl)-biphenyl ( <b>DPI-BP</b> )                                                     | $\gamma$ -radiation | \                                     | $7 \times 10^{-3}$ Gy    | <sup>1</sup> |
| (TMA) <sub>2</sub> [(UO <sub>2</sub> ) <sub>4</sub> (ox) <sub>4</sub> L]                                                   | $\gamma$ -radiation | \                                     | $1.64 \times 10^{-4}$ Gy | <sup>2</sup> |
|                                                                                                                            | X-radiation         | \                                     | $5.2 \times 10^{-4}$ Gy  |              |
|                                                                                                                            | UV radiation        | 20 min                                | \                        |              |
| [UO <sub>2</sub> (L)(DMF)]                                                                                                 | UV radiation        | \                                     | $2.4 \times 10^{-7}$ J   | <sup>3</sup> |
| [Hphen] <sub>2</sub> [(UO <sub>2</sub> ) <sub>2</sub> (ox) <sub>3</sub> ]                                                  | UV radiation        | ~ 5 s                                 | $6.9 \times 10^{-9}$ J   | <sup>4</sup> |
| UO <sub>2</sub> (ox)(H <sub>2</sub> O)·2H <sub>2</sub> O                                                                   | X-radiation         | \                                     | $1.18 \times 10^{-5}$ Gy | <sup>5</sup> |
|                                                                                                                            | $\gamma$ -radiation | \                                     | $1.42 \times 10^{-5}$ Gy |              |
|                                                                                                                            | UV radiation        | ~112 s                                | \                        |              |
| <b>Ln-DBTPA</b>                                                                                                            | UV radiation        | \                                     | $9.1 \times 10^{-9}$ J   | <sup>6</sup> |
| [4,4-bpyH] <sub>1.5</sub> (UO <sub>2</sub> )(TppmH <sub>4.5</sub> )(H <sub>2</sub> O)·2H <sub>2</sub> O ( <b>UPF-112</b> ) | UV radiation        | 19 min                                | $9.54 \times 10^{-12}$ J | This work    |
| [2,2-bpyH](UO <sub>2</sub> ) <sub>2</sub> (TppmH <sub>3</sub> )(H <sub>2</sub> O)·H <sub>2</sub> O ( <b>UPF-113</b> )      | UV radiation        | 12 min                                | $5.98 \times 10^{-12}$ J |              |
| [phenH](UO <sub>2</sub> ) <sub>1.5</sub> (TppmH <sub>4</sub> ) ( <b>UPF-114</b> )                                          | UV radiation        | 3 min                                 | $2.96 \times 10^{-12}$ J |              |

## 1.10 EPR Spectra Before and After UV Irradiation

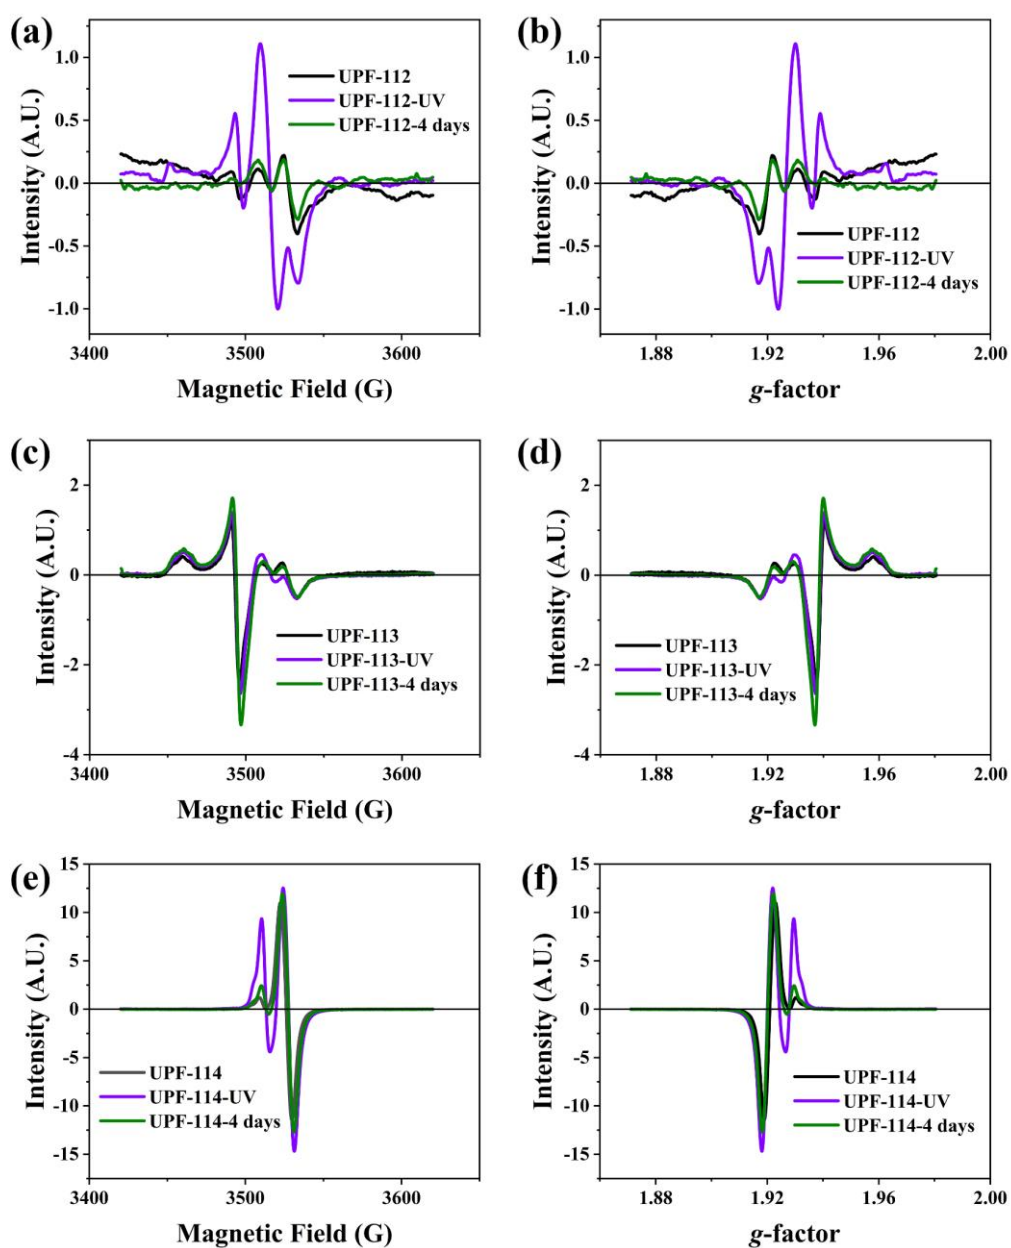

**Figure S24.** EPR spectra of **UPF-112** (a, b), **UPF-113** (c, d), and **UPF-114** (e, f) before and after UV irradiation for 3 hours and stored in the dark for 4 days.

## 2. References

1. J.-M. Han, M. Xu, B. Wang, N. Wu, X. Yang, H. Yang, B. J. Salter and L. Zang, Low Dose Detection of  $\gamma$  Radiation via Solvent Assisted Fluorescence Quenching, *J. Am. Chem. Soc.*, 2014, **136**, 5090-5096.
2. J. Xie, Y. Wang, W. Liu, X. Yin, L. Chen, Y. Zou, J. Diwu, Z. Chai, T. E. Albrecht-Schmitt, G. Liu and S. Wang, Highly Sensitive Detection of Ionizing Radiations by a Photoluminescent Uranyl Organic Framework, *Angew. Chem. Int. Ed.*, 2017, **56**, 7500-7504.
3. W. Liu, X. Dai, J. Xie, M. A. Silver, D. Zhang, Y. Wang, Y. Cai, J. Diwu, J. Wang, R. Zhou, Z. Chai and S. Wang, Highly Sensitive Detection of UV Radiation Using a Uranium Coordination Polymer, *ACS Appl. Mater. Interfaces*, 2018, **10**, 4844-4850.
4. J. Xie, Y. Wang, D. Zhang, C. Liang, W. Liu, Y. Chong, X. Yin, Y. Zhang, D. Gui, L. Chen, W. Tong, Z. Liu, J. Diwu, Z. Chai and S. Wang, Photo-exfoliation of a highly photo-responsive two-dimensional metal-organic framework, *Chem. Commun.*, 2019, **55**, 11715-11718.
5. J. Xie, Y. Wang, W. Liu, C. Liang, Y. Zhang, L. Chen, D. Sheng, Z. Chai and S. Wang, A uranyl based coordination polymer showing response to low-dosage ionizing radiations down to  $10^{-5}$  Gy, *Sci. China: Chem.*, 2020, **63**, 1608-1612.
6. S. Zhang, L. Chen, J. Xie, Y. Zhang, F. Huang, X. Wang, K. Li, F. Zhai, Q. Yang, L. Chen, Y. Wang, X. Dai, Z. Chai and S. Wang, Turn-up Luminescent Sensing of Ultraviolet Radiation by Lanthanide Metal-Organic Frameworks, *Inorg. Chem.*, 2022, **61**, 4561-4565.
